# Supplementary material for: The enantioseparation and determination of sulconazole enantiomers in rat plasma and tissues by a chiral HPLC–ESI–MS/MS method and its application to studies on stereoselective pharmacokinetics and tissue distribution
Source: Royal Society of Chemistry journal article supplement (doi:10.1039/d1nj04882a), 2022-01-01
Supplement: d1nj04882a1.pdf [file d1nj04882a1.pdf]

**Table S1.** Intra- and inter-day accuracy and precision of *S*-(+)-sulconazole and *R*-(-)-sulconazole in plasma and tissue samples.

| Analytes          | Nominal concentration (ng/mL) | Intra-day (n=6)                  |         |         | Inter-day (n=18)                 |          |         |     |
|-------------------|-------------------------------|----------------------------------|---------|---------|----------------------------------|----------|---------|-----|
|                   |                               | Calculated concentration (ng/mL) | RE (%)  | RSD (%) | Calculated concentration (ng/mL) | RE (%)   | RSD (%) |     |
| Plasma            | 1.0                           | 0.9±0.1                          | -10.0   | 11.1    | 1.1±0.1                          | 10.0     | 9.1     |     |
|                   | <i>S</i> -(+)-Sul             | 4.0                              | 4.2±0.2 | 5.0     | 4.8                              | 3.9±0.2  | -2.5    | 5.1 |
|                   | 40.0                          | 39.6±1.7                         | -1.0    | 4.3     | 41.4±1.5                         | 3.5      | 3.6     |     |
|                   | 80.0                          | 81.8±2.8                         | 2.3     | 3.4     | 78.3±2.1                         | -2.1     | 2.7     |     |
| <i>R</i> -(-)-Sul | 1.0                           | 0.9±0.1                          | -10.0   | 11.1    | 1.1±0.1                          | 10.0     | 9.1     |     |
|                   | 4.0                           | 4.1±0.2                          | 2.5     | 4.9     | 3.9±0.2                          | -2.5     | 5.1     |     |
|                   | 40.0                          | 39.1±1.8                         | -2.3    | 4.6     | 41.6±1.8                         | 4.0      | 4.3     |     |
|                   | 80.0                          | 81.5±2.6                         | 1.9     | 3.2     | 78.8±2.5                         | -1.5     | 3.2     |     |
| Brain             | 2.5                           | 2.3±0.1                          | -8.0    | 4.3     | 2.7±0.3                          | 8.0      | 11.1    |     |
|                   | <i>S</i> -(+)-Sul             | 10.0                             | 9.4±0.3 | -6.0    | 3.2                              | 10.8±0.4 | 8.0     | 3.7 |
|                   | 40.0                          | 42.0±2.6                         | 5.0     | 6.2     | 41.3±1.6                         | 3.3      | 3.9     |     |
|                   | 80.0                          | 81.4±3.7                         | 1.8     | 4.5     | 79.3±2.2                         | -0.9     | 2.8     |     |
| <i>R</i> -(-)-Sul | 2.5                           | 2.4±0.2                          | -4.0    | 8.3     | 2.6±0.2                          | 4.0      | 7.7     |     |
|                   | 10.0                          | 9.5±0.3                          | -5.0    | 3.2     | 11.1±0.4                         | 11.0     | 3.6     |     |
|                   | 40.0                          | 41.9±2.5                         | 4.8     | 6.0     | 41.1±1.5                         | 2.8      | 3.6     |     |
|                   | 80.0                          | 81.8±3.5                         | 2.3     | 4.3     | 79.7±2.8                         | -0.4     | 3.5     |     |
| Heart             | 1.0                           | 1.1±0.1                          | 10.0    | 9.1     | 0.9±0.1                          | -10.2    | 11.1    |     |
|                   | <i>S</i> -(+)-Sul             | 4.0                              | 4.4±0.3 | 10.0    | 6.8                              | 4.2±0.3  | 5.0     | 7.1 |
|                   | 200.0                         | 206.3±3.0                        | 3.2     | 1.5     | 205.3±3.4                        | 2.7      | 1.7     |     |

|        |                   |       |           |       |      |           |       |      |
|--------|-------------------|-------|-----------|-------|------|-----------|-------|------|
|        |                   | 400.0 | 395.7±4.9 | -1.1  | 1.2  | 406.3±5.2 | 1.6   | 1.3  |
|        |                   | 1.0   | 1.1±0.1   | 10.0  | 9.1  | 0.9±0.1   | -10.0 | 11.1 |
|        | <i>R</i> -(-)-Sul | 4.0   | 4.1±0.3   | 2.5   | 7.3  | 4.1±0.2   | 2.5   | 4.9  |
|        |                   | 200.0 | 205.9±3.3 | 3.0   | 1.6  | 204.6±3.1 | 2.3   | 1.5  |
|        |                   | 400.0 | 396.4±5.0 | -0.9  | 1.3  | 405.8±4.9 | 1.5   | 1.2  |
|        |                   | 1.0   | 1.1±0.1   | 10.0  | 9.1  | 1.1±0.1   | 10.0  | 9.1  |
|        | <i>S</i> -(+)-Sul | 4.0   | 4.2±0.4   | 5.0   | 4.8  | 4.2±0.3   | 5.0   | 7.1  |
| Liver  |                   | 200.0 | 191.7±3.5 | -4.2  | 1.8  | 205.0±3.3 | 2.5   | 1.6  |
|        |                   | 400.0 | 405.9±6.4 | 1.5   | 1.6  | 408.7±4.5 | 2.2   | 1.1  |
|        |                   | 1.0   | 1.1±0.1   | 10.0  | 9.1  | 1.1±0.1   | 10.0  | 9.1  |
|        | <i>R</i> -(-)-Sul | 4.0   | 4.1±0.3   | 2.5   | 4.9  | 4.3±0.3   | 7.5   | 7.0  |
|        |                   | 200.0 | 193.0±4.0 | -3.5  | 2.1  | 207.1±4.8 | 3.6   | 2.3  |
|        |                   | 400.0 | 408.2±7.1 | 2.1   | 1.8  | 410.1±4.8 | 2.5   | 1.2  |
|        |                   | 1.0   | 0.9±0.1   | -10.0 | 11.1 | 0.9±0.1   | -10.0 | 11.1 |
|        | <i>S</i> -(+)-Sul | 2.0   | 2.1±1.7   | 5.0   | 8.1  | 2.2±0.7   | 10.0  | 3.2  |
| Spleen |                   | 40.0  | 39.1±5.7  | -2.3  | 1.5  | 42.1±2.4  | 5.3   | 5.7  |
|        |                   | 80.0  | 82.8±4.7  | 3.5   | 5.7  | 78.9±5.1  | -1.4  | 6.5  |
|        |                   | 1.0   | 0.9±0.1   | -10.0 | 11.1 | 0.9±0.1   | -10.0 | 11.1 |
|        | <i>R</i> -(-)-Sul | 2.0   | 2.2±1.9   | 10.0  | 8.6  | 2.2±0.8   | 10.0  | 3.6  |
|        |                   | 40.0  | 38.8±4.4  | -3.0  | 11.3 | 41.8±2.5  | 4.5   | 6.0  |
|        |                   | 80.0  | 82.1±4.0  | 2.6   | 4.9  | 78.6±4.9  | -1.8  | 6.2  |
|        |                   | 1.0   | 0.9±0.1   | -10.0 | 11.1 | 1.1±0.1   | 10.0  | 9.1  |
|        | <i>S</i> -(+)-Sul | 4.0   | 3.8±2.1   | -5.0  | 5.5  | 4.2±3.2   | 5.0   | 4.8  |
| Lung   |                   | 200.0 | 206.1±4.8 | 3.1   | 2.3  | 195.3±4.2 | -2.4  | 2.2  |

|                   |       |           |       |      |           |       |      |
|-------------------|-------|-----------|-------|------|-----------|-------|------|
|                   | 400.0 | 392.0±5.6 | -2.0  | 1.4  | 406.3±5.2 | 1.6   | 1.3  |
|                   | 1.0   | 0.9±0.1   | -10.0 | 11.1 | 1.1±0.1   | 10.1  | 9.1  |
| <i>R</i> -(-)-Sul | 4.0   | 3.8±2.3   | -5.0  | 6.1  | 4.3±2.9   | 7.5   | 6.7  |
|                   | 200.0 | 207.3±5.0 | 3.7   | 2.4  | 193.8±4.5 | -3.1  | 2.3  |
|                   | 400.0 | 391.5±6.1 | -2.1  | 1.6  | 405.9±5.0 | 1.5   | 1.2  |
|                   | 1.0   | 1.1±0.1   | 10.0  | 9.1  | 1.1±0.1   | 10.0  | 9.1  |
| <i>S</i> -(+)-Sul | 4.0   | 4.2±0.3   | 5.0   | 7.1  | 3.8±0.2   | -5.0  | 5.3  |
|                   | 200.0 | 191.5±8.9 | -4.3  | 4.6  | 193.5±6.8 | -3.3  | 3.5  |
| Kidney            | 400.0 | 405.5±8.8 | 1.4   | 2.2  | 406.1±5.1 | 1.5   | 1.3  |
|                   | 1.0   | 1.1±0.1   | 10.0  | 9.1  | 1.1±0.1   | 10.0  | 9.1  |
| <i>R</i> -(-)-Sul | 4.0   | 4.3±0.4   | 7.5   | 9.3  | 3.9±0.1   | -6.0  | 2.6  |
|                   | 200.0 | 192.0±9.0 | -4.0  | 4.7  | 192.8±7.0 | -5.1  | 3.6  |
|                   | 400.0 | 406.3±9.0 | 1.6   | 2.2  | 407.8±5.4 | 3.3   | 1.3  |
|                   | 2.0   | 1.9±0.2   | -5.0  | 10.5 | 2.1±0.2   | 5.0   | 9.5  |
| <i>S</i> -(+)-Sul | 10.0  | 10.8±0.4  | 8.0   | 3.7  | 9.1±0.3   | -9.0  | 3.3  |
| Small intestine   | 200.0 | 193.1±8.4 | -3.5  | 4.4  | 207.2±6.1 | 3.6   | 2.9  |
|                   | 400.0 | 408.5±5.4 | 2.1   | 1.3  | 391.3±5.2 | -2.2  | 1.3  |
|                   | 2.0   | 1.9±0.1   | -5.0  | 5.3  | 2.1±0.2   | 5.0   | 9.5  |
| <i>R</i> -(-)-Sul | 10.0  | 10.6±0.4  | 6.0   | 3.8  | 9.4±0.3   | -4.0  | 3.2  |
|                   | 200.0 | 194.7±8.4 | -2.7  | 4.3  | 206.8±5.9 | 3.4   | 2.9  |
|                   | 400.0 | 408.1±5.9 | 2.0   | 1.4  | 392.0±4.8 | -2.0  | 1.2  |
|                   | 1.0   | 1.1±0.1   | 10.0  | 9.1  | 0.9±0.1   | -10.0 | 11.1 |
| <i>S</i> -(+)-Sul | 4.0   | 3.9±0.4   | -2.5  | 10.3 | 4.2±0.4   | 5.0   | 9.5  |
| Muscle            | 40.0  | 41.7±2.8  | 4.3   | 6.7  | 38.4±3.7  | -4.0  | 9.6  |

|                   |      |          |      |     |          |       |      |
|-------------------|------|----------|------|-----|----------|-------|------|
|                   | 80.0 | 78.8±5.2 | -1.5 | 6.6 | 81.9±6.9 | 2.3   | 8.4  |
|                   | 1.0  | 1.1±0.1  | 10.0 | 9.1 | 0.9±0.1  | -10.0 | 11.1 |
| <i>R</i> -(-)-Sul | 4.0  | 3.7±0.3  | -7.5 | 8.1 | 4.1±0.3  | 2.5   | 7.3  |
|                   | 40.0 | 42.0±3.1 | 5.0  | 7.4 | 38.6±3.5 | -3.5  | 9.1  |
|                   | 80.0 | 79.2±5.6 | -1.0 | 7.1 | 82.1±7.3 | 2.6   | 8.9  |

**Table S2.** Extraction recoveries and matrix effects of *S*-(+)-sulconazole and *R*-(-)-sulconazole in plasma and tissue samples.

| Analytes          | Nominal concentration (ng/mL) | Recovery       |         | NMF            |         |
|-------------------|-------------------------------|----------------|---------|----------------|---------|
|                   |                               | (mean ± SD, %) | RSD (%) | (mean ± SD, %) | RSD (%) |
| Plasma            | 4.0                           | 92.6±3.3       | 3.6     | 104.3±3.2      | 3.1     |
|                   | 40.0                          | 100.8±5.3      | 5.3     | 98.4±5.1       | 5.2     |
|                   | 80.0                          | 91.4±3.4       | 3.7     | 101.3±2.9      | 2.9     |
| <i>R</i> -(-)-Sul | 4.0                           | 95.7±4.1       | 4.3     | 102.9±3.8      | 3.7     |
|                   | 40.0                          | 100.4±4.9      | 4.9     | 97.7±4.2       | 4.3     |
|                   | 80.0                          | 94.3±3.3       | 3.5     | 101.8±3.1      | 3.0     |

|        |           |       |           |     |           |     |
|--------|-----------|-------|-----------|-----|-----------|-----|
|        |           | 10.0  | 89.4±5.1  | 5.7 | 98.3±5.8  | 5.9 |
|        | S-(+)-Sul | 40.0  | 93.8±2.8  | 3.0 | 99.1±4.0  | 4.0 |
| Brain  |           | 80.0  | 96.0±4.9  | 5.1 | 101.2±8.9 | 8.8 |
|        |           | 10.0  | 89.1±5.0  | 5.6 | 98.2±5.5  | 5.6 |
|        | R-(-)-Sul | 40.0  | 93.1±3.3  | 3.5 | 99.9±4.7  | 4.7 |
|        |           | 80.0  | 95.8±4.2  | 4.4 | 102.1±8.0 | 7.8 |
|        |           | 4.0   | 95.8±6.5  | 6.5 | 98.8±4.8  | 5.6 |
|        | S-(+)-Sul | 200.0 | 94.1±4.0  | 4.3 | 99.1±3.0  | 3.0 |
| Heart  |           | 400.0 | 101.8±3.1 | 3.0 | 102.7±5.2 | 5.1 |
|        |           | 4.0   | 95.5±6.1  | 5.8 | 97.9±4.5  | 5.0 |
|        | R-(-)-Sul | 200.0 | 93.7±3.2  | 3.4 | 98.8±2.5  | 2.5 |
|        |           | 400.0 | 101.4±2.9 | 2.9 | 103.2±5.9 | 5.7 |
|        |           | 4.0   | 92.8±6.1  | 6.6 | 98.2±4.9  | 5.0 |
|        | S-(+)-Sul | 200.0 | 97.6±5.3  | 5.4 | 103.6±5.6 | 5.4 |
| Liver  |           | 400.0 | 90.2±4.0  | 4.4 | 99.4±6.0  | 6.0 |
|        |           | 4.0   | 92.0±5.0  | 5.4 | 99.7±5.0  | 5.0 |
|        | R-(-)-Sul | 200.0 | 97.0±4.9  | 5.1 | 103.0±6.1 | 5.9 |
|        |           | 400.0 | 89.1±3.8  | 4.3 | 99.8±4.8  | 4.8 |
|        |           | 2.0   | 93.1±4.1  | 4.4 | 98.2±4.6  | 4.7 |
|        | S-(+)-Sul | 40.0  | 100.2±9.4 | 9.4 | 103.1±6.7 | 6.5 |
| Spleen |           | 80.0  | 93.2±2.9  | 3.1 | 102.4±4.1 | 4.0 |
|        |           | 2.0   | 92.3±3.6  | 3.9 | 97.7±4.0  | 4.1 |
|        | R-(-)-Sul | 40.0  | 100.4±8.6 | 8.6 | 103.9±7.1 | 6.8 |
|        |           | 80.0  | 93.0±3.1  | 3.3 | 101.9±3.5 | 3.4 |

|                 |           |       |           |     |           |     |
|-----------------|-----------|-------|-----------|-----|-----------|-----|
|                 |           | 4.0   | 96.4±6.0  | 6.2 | 98.1±7.2  | 7.3 |
|                 | S-(+)-Sul | 200.0 | 92.8±4.3  | 4.6 | 104.3±5.4 | 5.2 |
| Lung            |           | 400.0 | 95.0±2.8  | 2.9 | 101.5±2.0 | 2.0 |
|                 |           | 4.0   | 97.1±5.5  | 5.7 | 99.4±7.6  | 7.6 |
|                 | R-(-)-Sul | 200.0 | 92.5±3.7  | 4.0 | 104.5±5.1 | 4.9 |
|                 |           | 400.0 | 95.8±3.1  | 3.2 | 101.0±1.9 | 1.9 |
|                 |           | 4.0   | 88.7±3.4  | 3.8 | 103.3±4.2 | 4.1 |
|                 | S-(+)-Sul | 200.0 | 101.3±4.8 | 4.7 | 99.7±6.9  | 6.9 |
|                 |           | 400.0 | 95.0±5.8  | 6.1 | 101.0±7.2 | 7.1 |
| Kidney          |           | 4.0   | 91.1±4.0  | 4.4 | 102.9±4.8 | 4.7 |
|                 | R-(-)-Sul | 200.0 | 100.8±3.0 | 3.0 | 99.5±7.0  | 7.0 |
|                 |           | 400.0 | 94.6±5.5  | 5.8 | 101.5±6.6 | 6.5 |
|                 |           | 10.0  | 102.5±5.5 | 7.2 | 98.6±5.4  | 6.8 |
|                 | S-(+)-Sul | 200.0 | 97.4±1.9  | 2.0 | 99.9±3.2  | 3.2 |
| Small intestine |           | 400.0 | 92.0±3.0  | 3.3 | 98.6±5.2  | 5.3 |
|                 |           | 10.0  | 101.3±4.5 | 7.3 | 97.9±5.3  | 6.3 |
|                 | R-(-)-Sul | 200.0 | 97.5±2.2  | 2.3 | 100.3±2.1 | 2.1 |
|                 |           | 400.0 | 92.9±3.8  | 4.1 | 98.4±5.0  | 5.1 |
|                 |           | 4.0   | 96.3±3.3  | 3.4 | 101.6±8.1 | 8.0 |
|                 | S-(+)-Sul | 40.0  | 101.4±5.2 | 5.1 | 99.2±2.9  | 3.1 |
| Muscle          |           | 80.0  | 94.1±4.0  | 4.3 | 98.6±3.3  | 3.4 |
|                 |           | 4.0   | 95.8±3.9  | 4.1 | 102.0±7.7 | 7.5 |
|                 | R-(-)-Sul | 40.0  | 101.9±5.0 | 4.9 | 99.1±2.1  | 2.2 |
|                 |           | 80.0  | 93.2±1.8  | 1.9 | 98.0±3.5  | 3.6 |

NMF: normalized matrix factor.



**Table S3.** Stability results of *S*-(+)- and *R*-(-)-sulconazole in plasma and tissues under various storage conditions (n = 6)

| Analytes | Nominal concentration (ng/mL) | Room temperature for 12 h |         | On the autosampler tray 4°C for 24 h |         | -80°C for 30 days |         | Three freeze-thaw cycles |         |     |
|----------|-------------------------------|---------------------------|---------|--------------------------------------|---------|-------------------|---------|--------------------------|---------|-----|
|          |                               | RE (%)                    | RSD (%) | RE (%)                               | RSD (%) | RE (%)            | RSD (%) | RE (%)                   | RSD (%) |     |
| Plasma   | 4.0                           | -9.6                      | 8.8     | 6.3                                  | 8.8     | 4.6               | 5.2     | 10.2                     | 10.2    |     |
|          | S-(+)-Sul                     | 40.0                      | 3.7     | 5.4                                  | 3.7     | 6.2               | -6.7    | 2.8                      | -6.9    | 6.1 |
|          | 80.0                          | 1.9                       | 2.8     | -1.8                                 | 2.6     | 5.2               | 4.7     | 4.1                      | 3.7     |     |
|          | 4.0                           | -9.8                      | 9.1     | 6.5                                  | 9.1     | 4.8               | 5.4     | 10.8                     | 9.9     |     |
|          | R-(-)-Sul                     | 40.0                      | 4.0     | 5.0                                  | 4.1     | 6.1               | -7.1    | 3.0                      | -7.2    | 6.0 |
|          | 80.0                          | 2.1                       | 3.1     | -1.5                                 | 3.0     | 5.1               | 4.9     | 3.9                      | 3.9     |     |
| Brain    | 10.0                          | -6.2                      | 9.2     | 9.8                                  | 7.3     | 8.6               | 6.8     | -8.4                     | 7.4     |     |
|          | S-(+)-Sul                     | 40.0                      | -3.7    | 4.3                                  | 5.9     | 5.5               | -6.7    | 7.1                      | 6.7     | 5.2 |
|          | 80.0                          | 5.1                       | 3.6     | -4.2                                 | 2.8     | 2.2               | 3.4     | 4.1                      | 3.7     |     |
|          | 10.0                          | -6.5                      | 9.0     | 10.1                                 | 7.5     | 8.8               | 6.4     | -8.6                     | 7.1     |     |
|          | R-(-)-Sul                     | 40.0                      | -3.5    | 4.5                                  | 6.0     | 5.3               | -7.1    | 7.0                      | 6.2     | 5.5 |
|          | 80.0                          | 5.0                       | 4.1     | -4.1                                 | 2.9     | 2.0               | 3.5     | 4.5                      | 4.0     |     |
| Heart    | 4.0                           | 9.7                       | 7.4     | -10.8                                | 9.4     | -4.6              | 4.7     | -1.7                     | 3.8     |     |
|          | S-(+)-Sul                     | 200.0                     | -7.2    | 4.6                                  | 6.9     | 3.1               | -1.9    | 3.2                      | 2.8     | 1.8 |
|          | 400.0                         | 4.4                       | 5.0     | 3.6                                  | 0.9     | 1.1               | 1.4     | -1.2                     | 4.3     |     |
|          | 4.0                           | 9.5                       | 7.1     | -10.2                                | 9.1     | -4.4              | 4.9     | -2.0                     | 3.4     |     |
|          | R-(-)-Sul                     | 200.0                     | -7.0    | 4.2                                  | 7.0     | 3.0               | -2.2    | 3.0                      | 2.9     | 2.0 |
|          | 400.0                         | 4.2                       | 5.1     | 3.3                                  | 1.2     | 1.3               | 1.2     | -1.0                     | 3.9     |     |
|          | 4.0                           | 3.4                       | 4.4     | 4.9                                  | 2.5     | -9.7              | 7.7     | 4.2                      | 3.9     |     |



|        |           |       |      |     |      |     |      |     |      |     |
|--------|-----------|-------|------|-----|------|-----|------|-----|------|-----|
|        | S-(+)-Sul | 200.0 | -4.2 | 1.8 | -3.8 | 1.3 | 6.3  | 6.2 | 5.5  | 2.8 |
| Liver  |           | 400.0 | 1.8  | 1.4 | 2.2  | 0.8 | 2.8  | 1.9 | -3.9 | 1.2 |
|        |           | 4.0   | 3.6  | 4.6 | 5.2  | 2.4 | -9.4 | 7.1 | 4.0  | 3.6 |
|        | R-(-)-Sul | 200.0 | -4.1 | 2.0 | -3.7 | 1.4 | 6.1  | 6.3 | 5.2  | 2.6 |
|        |           | 400.0 | 2.0  | 1.5 | 2.0  | 1.1 | 2.2  | 2.2 | -3.5 | 1.4 |
|        |           | 2.0   | 12.4 | 8.6 | 6.6  | 4.2 | -8.2 | 6.3 | -3.1 | 5.7 |
|        | S-(+)-Sul | 40.0  | 3.9  | 3.5 | 2.8  | 3.6 | 4.3  | 3.8 | 4.4  | 2.2 |
| Spleen |           | 80.0  | -1.5 | 1.1 | -4.7 | 1.2 | 2.8  | 1.9 | 1.2  | 0.9 |
|        |           | 2.0   | 12.0 | 8.4 | 6.2  | 4.1 | -7.7 | 6.5 | -2.9 | 6.3 |
|        | R-(-)-Sul | 40.0  | 4.1  | 3.0 | 2.5  | 3.2 | 4.1  | 3.3 | 4.1  | 2.0 |
|        |           | 80.0  | -1.2 | 0.6 | -4.5 | 0.9 | 2.4  | 1.7 | 1.1  | 0.9 |
|        |           | 4.0   | 3.8  | 4.3 | 5.2  | 4.0 | 9.3  | 6.4 | 2.8  | 2.6 |
|        | S-(+)-Sul | 200.0 | -2.9 | 3.9 | -3.8 | 2.5 | 3.1  | 2.7 | -5.5 | 4.2 |
| Lung   |           | 400.0 | 1.5  | 1.0 | 1.1  | 2.1 | -1.4 | 1.3 | 2.1  | 1.2 |
|        |           | 4.0   | 4.1  | 4.0 | 5.1  | 3.8 | 9.6  | 6.9 | 2.5  | 2.2 |
|        | R-(-)-Sul | 200.0 | -3.0 | 3.5 | -3.5 | 2.8 | 3.0  | 2.5 | -5.4 | 3.9 |
|        |           | 400.0 | 1.0  | 1.0 | 1.2  | 1.8 | -1.5 | 1.2 | 1.9  | 1.6 |
|        |           | 4.0   | 8.3  | 5.1 | 5.7  | 3.8 | 6.7  | 5.3 | -7.6 | 6.4 |
|        | S-(+)-Sul | 200.0 | 4.2  | 3.2 | -2.1 | 1.9 | -3.9 | 2.2 | 5.3  | 3.9 |
|        |           | 400.0 | -3.1 | 1.3 | 1.9  | 1.1 | 6.2  | 4.8 | 2.9  | 1.5 |
| Kidney |           | 4.0   | 8.0  | 4.8 | 5.5  | 3.6 | 6.4  | 5.5 | -7.8 | 6.3 |
|        | R-(-)-Sul | 200.0 | 4.0  | 2.7 | -1.9 | 1.6 | -3.3 | 2.4 | 5.5  | 3.5 |
|        |           | 400.0 | -2.8 | 1.0 | 2.2  | 1.0 | 6.0  | 4.5 | 2.5  | 1.6 |
|        |           | 10.0  | 5.4  | 3.6 | -6.2 | 4.2 | -9.7 | 6.3 | -7.8 | 6.2 |
|        | S-(+)-Sul | 200.0 | 4.7  | 2.9 | 4.0  | 3.5 | 4.8  | 2.8 | 3.5  | 1.9 |

|                 |           |       |      |     |       |     |       |     |      |     |
|-----------------|-----------|-------|------|-----|-------|-----|-------|-----|------|-----|
| Small intestine |           | 400.0 | -2.5 | 1.1 | 0.9   | 1.4 | 4.2   | 4.6 | 1.7  | 1.3 |
|                 |           | 10.0  | 5.1  | 3.4 | -5.9  | 4.0 | -10.1 | 6.1 | -7.5 | 5.9 |
|                 | R-(-)-Sul | 200.0 | 4.6  | 2.6 | 3.8   | 3.3 | 5.8   | 2.4 | 3.3  | 2.1 |
|                 |           | 400.0 | -2.2 | 1.3 | 1.3   | 1.2 | 3.8   | 4.0 | 1.5  | 1.1 |
| Muscle          |           | 4.0   | 8.8  | 6.3 | -10.4 | 6.3 | 7.3   | 5.5 | -6.6 | 4.2 |
|                 | S-(+)-Sul | 40.0  | -4.3 | 3.8 | 7.3   | 4.2 | 4.8   | 2.6 | 4.3  | 3.2 |
|                 |           | 80.0  | 5.2  | 4.1 | 5.5   | 4.6 | -2.7  | 1.3 | 2.7  | 1.4 |
|                 |           | 4.0   | 8.6  | 6.1 | -10.9 | 6.6 | 6.9   | 5.3 | -6.8 | 4.8 |
|                 | R-(-)-Sul | 40.0  | -4.0 | 3.3 | 7.0   | 3.9 | 4.4   | 2.4 | 4.6  | 3.0 |
|                 |           | 80.0  | 4.7  | 3.7 | 5.2   | 4.3 | -2.5  | 1.5 | 2.5  | 1.0 |
